# Supplementary material for: Elucidation of Cross-Talk and Specificity of Early Response Mechanisms to Salt and PEG-Simulated Drought Stresses in Brassica napus Using Comparative Proteomic Analysis
Source: PLoS One. 2015 Oct 8;10(10):e0138974. doi: 10.1371/journal.pone.0138974 (PMC4598015; doi:10.1371/journal.pone.0138974)
Supplement: S1 Table — (XLS) [file pone.0138974.s002.xls]

## Sheet: S1 Table
S1 Table. Osmotic potential of NaCl solution and PEG6000 solution at different concentration.
Concentration of NaCl solution	Osmotic potential	Concentration of PEG6000 solution	Osmotic potential
200 mM NaCl	-0.83	18％ PEG6000	-0.44
215 mM NaCl	-0.86	20％ PEG6000	-0.67
218 mM NaCl	-0.89	22％ PEG6000	-0.7
230 mM NaCl	-0.93	23％ PEG6000	-0.91
245 mM NaCl	-1	24% PEG6000	-0.95
250 mM NaCl	-1.14	25% PEG6000	-1
260 mM NaCl	-1.19	26% PEG6000	-1.03
